# Supplementary material for: Highly selective production of heavy hydrocarbons over cobalt–graphene–silica nanocomposite catalysts
Source: Royal Society of Chemistry journal article supplement (doi:10.1039/c7ra05887j), 2017-01-01
Supplement: c7ra05887j1.pdf [file c7ra05887j1.pdf]

## Supplementary information

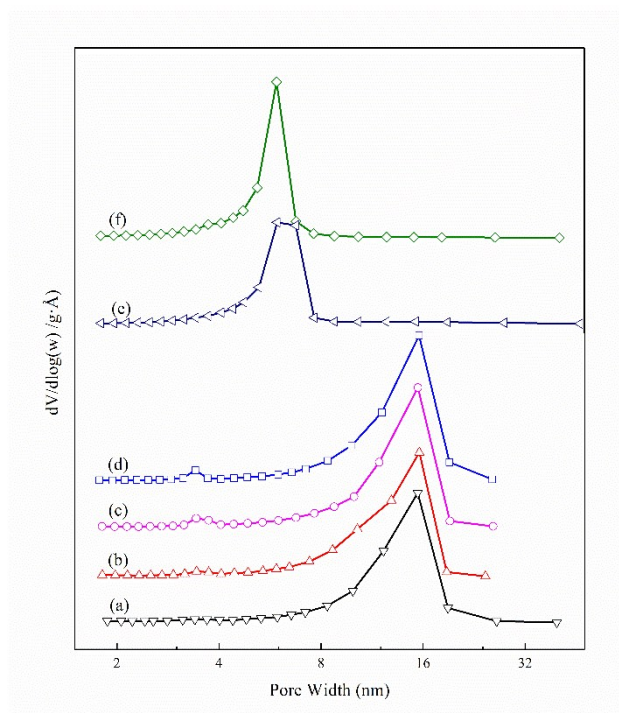

Fig. S1. The pore size distributions of silica and fresh catalysts: (a) Co-Si, (b) Co-0.1GSi, (c) Co-0.5GSi, (d) Co-1.0GSi, (e) 0.5GSi, and (f) SiO<sub>2</sub>.

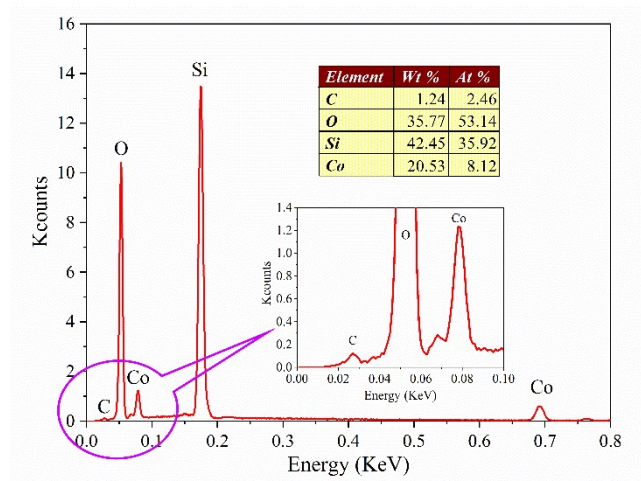

Fig. S2. EDS spectra of calcined Co-1.0GSi catalyst

Table S1 the temperature and H<sub>2</sub> consumption of the decomposed TPR profiles, with the assumption that the H<sub>2</sub> consumption of  $\alpha$  peak is in the proportions of 25%.

| Catalyst  | Temperature (°C) / Peak area (%) |          |          | H <sub>2</sub> consumption<br>(mmol/g) |
|-----------|----------------------------------|----------|----------|----------------------------------------|
|           | $\alpha$                         | $\beta$  | $\gamma$ |                                        |
| Co-Si     | 335 / 25                         | 376 / 19 | 410 / 56 | 3.934                                  |
| Co-0.1GSi | 334 / 25                         | 372 / 25 | 398 / 50 | 4.049                                  |
| Co-0.5GSi | 326 / 25                         | 370 / 38 | 404 / 37 | 4.157                                  |
| Co-1.0GSi | 326 / 25                         | 368 / 42 | 390 / 33 | 4.397                                  |

Table S2 Energy of the calcined catalysts and atomic ratio of Co/Si on the catalyst surface.

| Sample    | Co 2p <sub>3/2</sub> (eV) |                  |           | Spin-orbital<br>Splitting<br>(eV) | Co 2p <sub>1/2</sub> (eV) |                  |           | Co/Si<br>(Atomic<br>ratio %) |
|-----------|---------------------------|------------------|-----------|-----------------------------------|---------------------------|------------------|-----------|------------------------------|
|           | Co <sup>3+</sup>          | Co <sup>2+</sup> | Satellite |                                   | Co <sup>3+</sup>          | Co <sup>2+</sup> | Satellite |                              |
| Co-Si     | 779.8                     | 781.5            | 788.3     | 15.0                              | 794.8                     | 796.8            | 803.3     | 6.7                          |
| Co-1.0GSi | 779.9                     | 781.6            | 788.4     | 15.1                              | 795.0                     | 797.0            | 803.5     | 8.3                          |
